# Supplementary material for: Comparative Description of the Expression Profile of Interferon-Stimulated Genes in Multiple Cell Lineages Targeted by HIV-1 Infection
Source: Front Microbiol. 2019 Mar 12;10:429. doi: 10.3389/fmicb.2019.00429 (PMC6423081; doi:10.3389/fmicb.2019.00429)
Supplement: Supplementary file 4 [file Table_3.XLSX]

## Sheet: Sheet1
Supplementary Table S3. Microarray datasets of IFN-I treatment used in this study.
Cell type	Project ID	PMID	Run ID	Data type	Program to process raw data	Cells used	Treatment type	IFN-I used	Concentration	Treatment time (h)
MDM	E-MTAB-1437	24196705	ng_US10020348_252800417389_S01_GE2_107_Sep09_1_2	raw data	agilp (AAProcess, Baseline, AALoess)	Primary MDMs	IFN-I	IFN-β	10 ng/mL	24
MDM	E-MTAB-1437	24196705	ng_US10020348_252800417387_S02_GE2_107_Sep09_1_2	raw data	agilp (AAProcess, Baseline, AALoess)	Primary MDMs	IFN-I	IFN-β	10 ng/mL	24
MDM	E-MTAB-1437	24196705	ng_US10020348_252800417389_S01_GE2_107_Sep09_1_1	raw data	agilp (AAProcess, Baseline, AALoess)	Primary MDMs	Mock	IFN-β	10 ng/mL	24
MDM	E-MTAB-1437	24196705	ng_US10020348_252800417387_S02_GE2_107_Sep09_1_1	raw data	agilp (AAProcess, Baseline, AALoess)	Primary MDMs	Mock	IFN-β	10 ng/mL	24
Monocyte	E-GEOD-38351	22610275	GSM940491	raw data	affy (rma)	Primary monocytes	IFN-I	IFN-α2	100 ng/mL	1.5
Monocyte	E-GEOD-38351	22610275	GSM940492	raw data	affy (rma)	Primary monocytes	IFN-I	IFN-α2	100 ng/mL	1.5
Monocyte	E-GEOD-38351	22610275	GSM940493	raw data	affy (rma)	Primary monocytes	IFN-I	IFN-α2	100 ng/mL	1.5
Monocyte	E-GEOD-38351	22610275	GSM940494	raw data	affy (rma)	Primary monocytes	IFN-I	IFN-α2	100 ng/mL	1.5
Monocyte	E-GEOD-38351	22610275	GSM940495	raw data	affy (rma)	Primary monocytes	IFN-I	IFN-α2	100 ng/mL	1.5
Monocyte	E-GEOD-38351	22610275	GSM940496	raw data	affy (rma)	Primary monocytes	IFN-I	IFN-α2	100 ng/mL	1.5
Monocyte	E-GEOD-38351	22610275	GSM940497	raw data	affy (rma)	Primary monocytes	IFN-I	IFN-α2	100 ng/mL	1.5
Monocyte	E-GEOD-38351	22610275	GSM940505	raw data	affy (rma)	Primary monocytes	Mock	IFN-α2	100 ng/mL	1.5
Monocyte	E-GEOD-38351	22610275	GSM940506	raw data	affy (rma)	Primary monocytes	Mock	IFN-α2	100 ng/mL	1.5
Monocyte	E-GEOD-38351	22610275	GSM940507	raw data	affy (rma)	Primary monocytes	Mock	IFN-α2	100 ng/mL	1.5
Monocyte	E-GEOD-38351	22610275	GSM940508	raw data	affy (rma)	Primary monocytes	Mock	IFN-α2	100 ng/mL	1.5
Monocyte	E-GEOD-38351	22610275	GSM940509	raw data	affy (rma)	Primary monocytes	Mock	IFN-α2	100 ng/mL	1.5
Monocyte	E-GEOD-38351	22610275	GSM940510	raw data	affy (rma)	Primary monocytes	Mock	IFN-α2	100 ng/mL	1.5
Monocyte	E-GEOD-38351	22610275	GSM940511	raw data	affy (rma)	Primary monocytes	Mock	IFN-α2	100 ng/mL	1.5
Monocyte	E-GEOD-38351	22610275	GSM940512	raw data	affy (rma)	Primary monocytes	Mock	IFN-α2	100 ng/mL	1.5
Monocyte	E-GEOD-38351	22610275	GSM940513	raw data	affy (rma)	Primary monocytes	Mock	IFN-α2	100 ng/mL	1.5
Monocyte	E-GEOD-38351	22610275	GSM940514	raw data	affy (rma)	Primary monocytes	Mock	IFN-α2	100 ng/mL	1.5
Monocyte	E-GEOD-38351	22610275	GSM940515	raw data	affy (rma)	Primary monocytes	Mock	IFN-α2	100 ng/mL	1.5
CD4+ T cell	E-GEOD-46599	24048477	GSM1133032	processed data	NA	CEM	IFN-I	IFN-α	500-1000 U/mL	24
CD4+ T cell	E-GEOD-46599	24048477	GSM1133033	processed data	NA	CEM	IFN-I	IFN-α	500-1000 U/mL	24
CD4+ T cell	E-GEOD-46599	24048477	GSM1133034	processed data	NA	CEM	Mock	IFN-α	500-1000 U/mL	24
CD4+ T cell	E-GEOD-46599	24048477	GSM1133035	processed data	NA	CEM	Mock	IFN-α	500-1000 U/mL	24
CD4+ T cell	E-GEOD-46599	24048477	GSM1133036	processed data	NA	CEM-SS	IFN-I	IFN-α	500-1000 U/mL	24
CD4+ T cell	E-GEOD-46599	24048477	GSM1133037	processed data	NA	CEM-SS	IFN-I	IFN-α	500-1000 U/mL	24
CD4+ T cell	E-GEOD-46599	24048477	GSM1133038	processed data	NA	CEM-SS	Mock	IFN-α	500-1000 U/mL	24
CD4+ T cell	E-GEOD-46599	24048477	GSM1133039	processed data	NA	CEM-SS	Mock	IFN-α	500-1000 U/mL	24
CD4+ T cell	E-GEOD-46599	24048477	GSM1133044	processed data	NA	Jurkat	IFN-I	IFN-α	500-1000 U/mL	24
CD4+ T cell	E-GEOD-46599	24048477	GSM1133045	processed data	NA	Jurkat	IFN-I	IFN-α	500-1000 U/mL	24
CD4+ T cell	E-GEOD-46599	24048477	GSM1133046	processed data	NA	Jurkat	Mock	IFN-α	500-1000 U/mL	24
CD4+ T cell	E-GEOD-46599	24048477	GSM1133047	processed data	NA	Jurkat	Mock	IFN-α	500-1000 U/mL	24
MDM	E-GEOD-46599	24048477	GSM1133056	processed data	NA	Primary MDMs	IFN-I	IFN-α	500-1000 U/mL	24
MDM	E-GEOD-46599	24048477	GSM1133057	processed data	NA	Primary MDMs	IFN-I	IFN-α	500-1000 U/mL	24
MDM	E-GEOD-46599	24048477	GSM1133058	processed data	NA	Primary MDMs	IFN-I	IFN-α	500-1000 U/mL	24
MDM	E-GEOD-46599	24048477	GSM1133059	processed data	NA	Primary MDMs	Mock	IFN-α	500-1000 U/mL	24
MDM	E-GEOD-46599	24048477	GSM1133060	processed data	NA	Primary MDMs	Mock	IFN-α	500-1000 U/mL	24
MDM	E-GEOD-46599	24048477	GSM1133061	processed data	NA	Primary MDMs	Mock	IFN-α	500-1000 U/mL	24
CD4+ T cell	E-GEOD-46599	24048477	GSM1133062	processed data	NA	Primary CD4+ T cells	IFN-I	IFN-α	500-1000 U/mL	24
CD4+ T cell	E-GEOD-46599	24048477	GSM1133063	processed data	NA	Primary CD4+ T cells	IFN-I	IFN-α	500-1000 U/mL	24
CD4+ T cell	E-GEOD-46599	24048477	GSM1133064	processed data	NA	Primary CD4+ T cells	IFN-I	IFN-α	500-1000 U/mL	24
CD4+ T cell	E-GEOD-46599	24048477	GSM1133065	processed data	NA	Primary CD4+ T cells	Mock	IFN-α	500-1000 U/mL	24
CD4+ T cell	E-GEOD-46599	24048477	GSM1133066	processed data	NA	Primary CD4+ T cells	Mock	IFN-α	500-1000 U/mL	24
CD4+ T cell	E-GEOD-46599	24048477	GSM1133067	processed data	NA	Primary CD4+ T cells	Mock	IFN-α	500-1000 U/mL	24
Monocyte	E-GEOD-46599	24048477	GSM1133068	processed data	NA	THP-1	IFN-I	IFN-α	500-1000 U/mL	24
Monocyte	E-GEOD-46599	24048477	GSM1133069	processed data	NA	THP-1	IFN-I	IFN-α	500-1000 U/mL	24
Monocyte	E-GEOD-46599	24048477	GSM1133070	processed data	NA	THP-1	Mock	IFN-α	500-1000 U/mL	24
Monocyte	E-GEOD-46599	24048477	GSM1133071	processed data	NA	THP-1	Mock	IFN-α	500-1000 U/mL	24
Monocyte	E-GEOD-46599	24048477	GSM1133076	processed data	NA	U937	IFN-I	IFN-α	500-1000 U/mL	24
Monocyte	E-GEOD-46599	24048477	GSM1133077	processed data	NA	U937	IFN-I	IFN-α	500-1000 U/mL	24
Monocyte	E-GEOD-46599	24048477	GSM1133078	processed data	NA	U937	Mock	IFN-α	500-1000 U/mL	24
Monocyte	E-GEOD-46599	24048477	GSM1133079	processed data	NA	U937	Mock	IFN-α	500-1000 U/mL	24
CD4+ T cell	E-GEOD-54627	24865484	GSM1320098	raw data	oligo (rma)	Primary CD4+ T cells	Mock	IFN-α	10 ng/mL	4
CD4+ T cell	E-GEOD-54627	24865484	GSM1320099	raw data	oligo (rma)	Primary CD4+ T cells	IFN-I	IFN-α	10 ng/mL	4
CD4+ T cell	E-GEOD-54627	24865484	GSM1320100	raw data	oligo (rma)	Primary CD4+ T cells	Mock	IFN-α	10 ng/mL	4
CD4+ T cell	E-GEOD-54627	24865484	GSM1320101	raw data	oligo (rma)	Primary CD4+ T cells	IFN-I	IFN-α	10 ng/mL	4
CD4+ T cell	E-GEOD-54627	24865484	GSM1320102	raw data	oligo (rma)	Primary CD4+ T cells	Mock	IFN-α	10 ng/mL	4
CD4+ T cell	E-GEOD-54627	24865484	GSM1320103	raw data	oligo (rma)	Primary CD4+ T cells	IFN-I	IFN-α	10 ng/mL	4
CD4+ T cell	E-GEOD-54627	24865484	GSM1320104	raw data	oligo (rma)	Primary CD4+ T cells	Mock	IFN-α	10 ng/mL	4
CD4+ T cell	E-GEOD-54627	24865484	GSM1320105	raw data	oligo (rma)	Primary CD4+ T cells	IFN-I	IFN-α	10 ng/mL	4
CD4+ T cell	E-GEOD-54627	24865484	GSM1320106	raw data	oligo (rma)	Primary CD4+ T cells	Mock	IFN-α	10 ng/mL	4
CD4+ T cell	E-GEOD-54627	24865484	GSM1320107	raw data	oligo (rma)	Primary CD4+ T cells	IFN-I	IFN-α	10 ng/mL	4
CD4+ T cell	E-GEOD-54627	24865484	GSM1320108	raw data	oligo (rma)	Primary CD4+ T cells	Mock	IFN-α	10 ng/mL	4
CD4+ T cell	E-GEOD-54627	24865484	GSM1320109	raw data	oligo (rma)	Primary CD4+ T cells	IFN-I	IFN-α	10 ng/mL	4
CD4+ T cell	E-GEOD-54627	24865484	GSM1320110	raw data	oligo (rma)	Primary CD4+ T cells	Mock	IFN-α	10 ng/mL	4
CD4+ T cell	E-GEOD-54627	24865484	GSM1320111	raw data	oligo (rma)	Primary CD4+ T cells	IFN-I	IFN-α	10 ng/mL	4
CD4+ T cell	E-GEOD-54627	24865484	GSM1320112	raw data	oligo (rma)	Primary CD4+ T cells	Mock	IFN-α	10 ng/mL	4
CD4+ T cell	E-GEOD-54627	24865484	GSM1320113	raw data	oligo (rma)	Primary CD4+ T cells	IFN-I	IFN-α	10 ng/mL	4
CD4+ T cell	E-GEOD-54627	24865484	GSM1320114	raw data	oligo (rma)	Primary CD4+ T cells	Mock	IFN-α	10 ng/mL	4
CD4+ T cell	E-GEOD-54627	24865484	GSM1320115	raw data	oligo (rma)	Primary CD4+ T cells	IFN-I	IFN-α	10 ng/mL	4
CD4+ T cell	E-GEOD-54627	24865484	GSM1320116	raw data	oligo (rma)	Primary CD4+ T cells	Mock	IFN-α	10 ng/mL	4
CD4+ T cell	E-GEOD-54627	24865484	GSM1320117	raw data	oligo (rma)	Primary CD4+ T cells	IFN-I	IFN-α	10 ng/mL	4
CD4+ T cell	E-GEOD-54627	24865484	GSM1320118	raw data	oligo (rma)	Primary CD4+ T cells	Mock	IFN-α	10 ng/mL	4
CD4+ T cell	E-GEOD-54627	24865484	GSM1320119	raw data	oligo (rma)	Primary CD4+ T cells	IFN-I	IFN-α	10 ng/mL	4
CD4+ T cell	E-GEOD-54627	24865484	GSM1320120	raw data	oligo (rma)	Primary CD4+ T cells	Mock	IFN-α	10 ng/mL	4
CD4+ T cell	E-GEOD-54627	24865484	GSM1320121	raw data	oligo (rma)	Primary CD4+ T cells	IFN-I	IFN-α	10 ng/mL	4
CD4+ T cell	E-GEOD-54627	24865484	GSM1320122	raw data	oligo (rma)	Primary CD4+ T cells	Mock	IFN-α	10 ng/mL	4
CD4+ T cell	E-GEOD-54627	24865484	GSM1320123	raw data	oligo (rma)	Primary CD4+ T cells	IFN-I	IFN-α	10 ng/mL	4
CD4+ T cell	E-GEOD-54627	24865484	GSM1320124	raw data	oligo (rma)	Primary CD4+ T cells	Mock	IFN-α	10 ng/mL	4
CD4+ T cell	E-GEOD-54627	24865484	GSM1320125	raw data	oligo (rma)	Primary CD4+ T cells	IFN-I	IFN-α	10 ng/mL	4
CD4+ T cell	E-GEOD-54627	24865484	GSM1320126	raw data	oligo (rma)	Primary CD4+ T cells	Mock	IFN-α	10 ng/mL	4
CD4+ T cell	E-GEOD-54627	24865484	GSM1320127	raw data	oligo (rma)	Primary CD4+ T cells	IFN-I	IFN-α	10 ng/mL	4
CD4+ T cell	E-GEOD-54627	24865484	GSM1320128	raw data	oligo (rma)	Primary CD4+ T cells	Mock	IFN-α	10 ng/mL	4
CD4+ T cell	E-GEOD-54627	24865484	GSM1320129	raw data	oligo (rma)	Primary CD4+ T cells	IFN-I	IFN-α	10 ng/mL	4
CD4+ T cell	E-GEOD-54627	24865484	GSM1320130	raw data	oligo (rma)	Primary CD4+ T cells	Mock	IFN-α	10 ng/mL	4
CD4+ T cell	E-GEOD-54627	24865484	GSM1320131	raw data	oligo (rma)	Primary CD4+ T cells	IFN-I	IFN-α	10 ng/mL	4
CD4+ T cell	E-GEOD-54627	24865484	GSM1320132	raw data	oligo (rma)	Primary CD4+ T cells	Mock	IFN-α	10 ng/mL	4
CD4+ T cell	E-GEOD-54627	24865484	GSM1320133	raw data	oligo (rma)	Primary CD4+ T cells	IFN-I	IFN-α	10 ng/mL	4
CD4+ T cell	E-GEOD-54627	24865484	GSM1320134	raw data	oligo (rma)	Primary CD4+ T cells	Mock	IFN-α	10 ng/mL	4
CD4+ T cell	E-GEOD-54627	24865484	GSM1320135	raw data	oligo (rma)	Primary CD4+ T cells	IFN-I	IFN-α	10 ng/mL	4
CD4+ T cell	E-GEOD-54627	24865484	GSM1320136	raw data	oligo (rma)	Primary CD4+ T cells	Mock	IFN-α	10 ng/mL	4
CD4+ T cell	E-GEOD-54627	24865484	GSM1320137	raw data	oligo (rma)	Primary CD4+ T cells	IFN-I	IFN-α	10 ng/mL	4
CD4+ T cell	E-GEOD-54627	24865484	GSM1320138	raw data	oligo (rma)	Primary CD4+ T cells	Mock	IFN-α	10 ng/mL	4
CD4+ T cell	E-GEOD-54627	24865484	GSM1320139	raw data	oligo (rma)	Primary CD4+ T cells	IFN-I	IFN-α	10 ng/mL	4
CD4+ T cell	E-GEOD-54627	24865484	GSM1320140	raw data	oligo (rma)	Primary CD4+ T cells	Mock	IFN-α	10 ng/mL	4
CD4+ T cell	E-GEOD-54627	24865484	GSM1320141	raw data	oligo (rma)	Primary CD4+ T cells	IFN-I	IFN-α	10 ng/mL	4
CD4+ T cell	E-GEOD-54627	24865484	GSM1320142	raw data	oligo (rma)	Primary CD4+ T cells	Mock	IFN-α	10 ng/mL	4
CD4+ T cell	E-GEOD-54627	24865484	GSM1320143	raw data	oligo (rma)	Primary CD4+ T cells	IFN-I	IFN-α	10 ng/mL	4
CD4+ T cell	E-GEOD-54627	24865484	GSM1320144	raw data	oligo (rma)	Primary CD4+ T cells	Mock	IFN-α	10 ng/mL	4
CD4+ T cell	E-GEOD-54627	24865484	GSM1320145	raw data	oligo (rma)	Primary CD4+ T cells	IFN-I	IFN-α	10 ng/mL	4
NA, not applicable.
